# Supplementary material for: Two-temperature model of the non-thermal chemical dissociation of CO2
Source: Royal Society of Chemistry journal article supplement (doi:10.1039/d4re00300d), 2024-10-21
Supplement: d4re00300d1.pdf [file d4re00300d1.pdf]

# Two-temperature Model of the Non-thermal Chemical Dissociation of CO<sub>2</sub>

Q. Shen,<sup>†</sup> A. Pikalev,<sup>†,‡</sup> F. J. J. Peeters,<sup>†,§</sup> J. Gans,<sup>†</sup> and M. C. M. van de  
Sanden<sup>\*,†,¶</sup>

<sup>†</sup>*Dutch Institute for Fundamental Energy Research, Eindhoven, The Netherlands*

<sup>‡</sup>*Instituto de Plasmas e Fusão Nuclear, Instituto Superior Técnico, Universidade de Lisboa,  
Lisboa, Portugal*

<sup>¶</sup>*Department of Applied Physics, Eindhoven Institute of Renewable Energy Systems,  
Eindhoven University of Technology, Eindhoven, The Netherlands*

<sup>§</sup>*Leyden Jar company, Eindhoven, The Netherlands*

E-mail: M.C.M.vandeSanden@diffier.nl

## Supporting Information for Publication

Table S1: CO vibrational levels and the corresponding energies in eV.

| $v$ | $E_v$ (eV) |
|-----|------------|-----|------------|-----|------------|-----|------------|
| 0   | 0.0000     | 20  | 4.8243     | 40  | 8.2869     | 60  | 10.3877    |
| 1   | 0.2735     | 21  | 5.0297     | 41  | 8.4243     | 61  | 10.4570    |
| 2   | 0.5437     | 22  | 5.2318     | 42  | 8.5582     | 62  | 10.5229    |
| 3   | 0.8104     | 23  | 5.4305     | 43  | 8.6888     | 63  | 10.5854    |
| 4   | 1.0738     | 24  | 5.6257     | 44  | 8.8160     | 64  | 10.6445    |
| 5   | 1.3337     | 25  | 5.8176     | 45  | 8.9397     | 65  | 10.7002    |
| 6   | 1.5902     | 26  | 6.0060     | 46  | 9.0601     | 66  | 10.7524    |
| 7   | 1.8434     | 27  | 6.1911     | 47  | 9.1771     | 67  | 10.8013    |
| 8   | 2.0931     | 28  | 6.3727     | 48  | 9.2906     | 68  | 10.8468    |
| 9   | 2.3394     | 29  | 6.5510     | 49  | 9.4008     | 69  | 10.8888    |
| 10  | 2.5823     | 30  | 6.7258     | 50  | 9.5075     | 70  | 10.9275    |
| 11  | 2.8218     | 31  | 6.8972     | 51  | 9.6109     | 71  | 10.9628    |
| 12  | 3.0580     | 32  | 7.0652     | 52  | 9.7108     | 72  | 10.9946    |
| 13  | 3.2907     | 33  | 7.2299     | 53  | 9.8073     | 73  | 11.0231    |
| 14  | 3.5200     | 34  | 7.3911     | 54  | 9.9005     | 74  | 11.0481    |
| 15  | 3.7459     | 35  | 7.5489     | 55  | 9.9902     | 75  | 11.0697    |
| 16  | 3.9684     | 36  | 7.7033     | 56  | 10.0765    | 76  | 11.0880    |
| 17  | 4.1874     | 37  | 7.8543     | 57  | 10.1594    | 77  | 11.1028    |
| 18  | 4.4031     | 38  | 8.0019     | 58  | 10.2389    | 78  | 11.1142    |
| 19  | 4.6154     | 39  | 8.1461     | 59  | 10.3150    | 79  | 11.1222    |
|     |            |     |            |     |            | 80  | 11.1267    |

Table S2: O<sub>2</sub> vibrational levels and the corresponding energies in eV.

| $v$ | $E_v$ (eV) |
|-----|------------|-----|------------|-----|------------|-----|------------|
| 0   | 0.0000     | 12  | 2.139287   | 24  | 3.808175   | 36  | 4.8592263  |
| 1   | 0.1932     | 13  | 2.298086   | 25  | 3.921774   | 37  | 4.9125262  |
| 2   | 0.3838     | 14  | 2.453585   | 26  | 4.031073   | 38  | 4.9597961  |
| 3   | 0.57196    | 15  | 2.605684   | 27  | 4.1359072  | 39  | 5.000846   |
| 4   | 0.75745    | 16  | 2.754283   | 28  | 4.2361671  | 40  | 5.03548159 |
| 5   | 0.94034    | 17  | 2.899282   | 29  | 4.331757   | 41  | 5.06354858 |
| 6   | 1.12043    | 18  | 3.040681   | 30  | 4.4225569  | 42  | 5.08497657 |
| 7   | 1.29772    | 19  | 3.17838    | 31  | 4.5084468  | 43  | 5.09990256 |
| 8   | 1.47211    | 20  | 3.312279   | 32  | 4.5892867  | 44  | 5.10892516 |
| 9   | 1.64359    | 21  | 3.442378   | 33  | 4.6649366  | 45  | 5.11337385 |
| 10  | 1.811889   | 22  | 3.568377   | 34  | 4.7352565  | 46  | 5.11500725 |
| 11  | 1.977188   | 23  | 3.690376   | 35  | 4.8000764  |     |            |

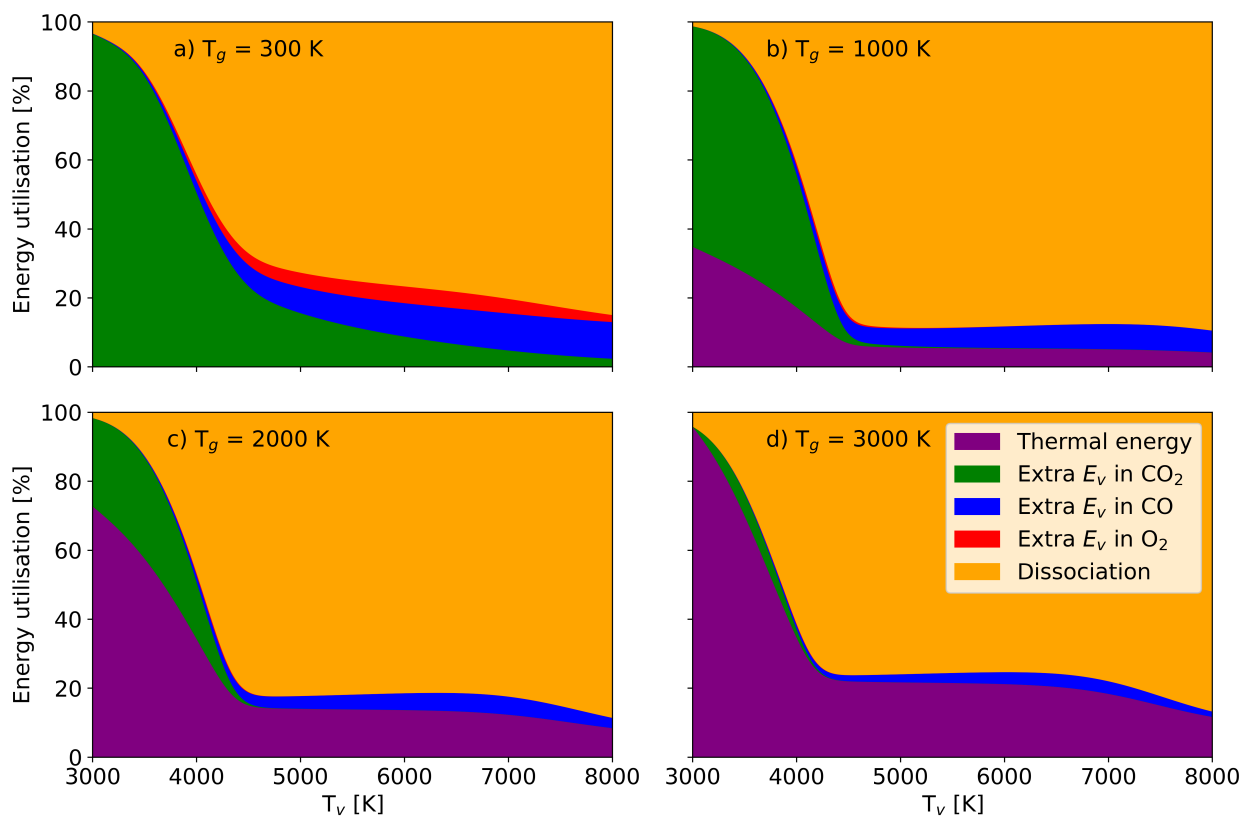

Figure S1: The energy utilisation fraction as a function of the vibrational temperature at a residence time of 1 ms, and a gas temperature of a) 300 K; b) 1000 K; c) 2000 K; and d) 3000 K.

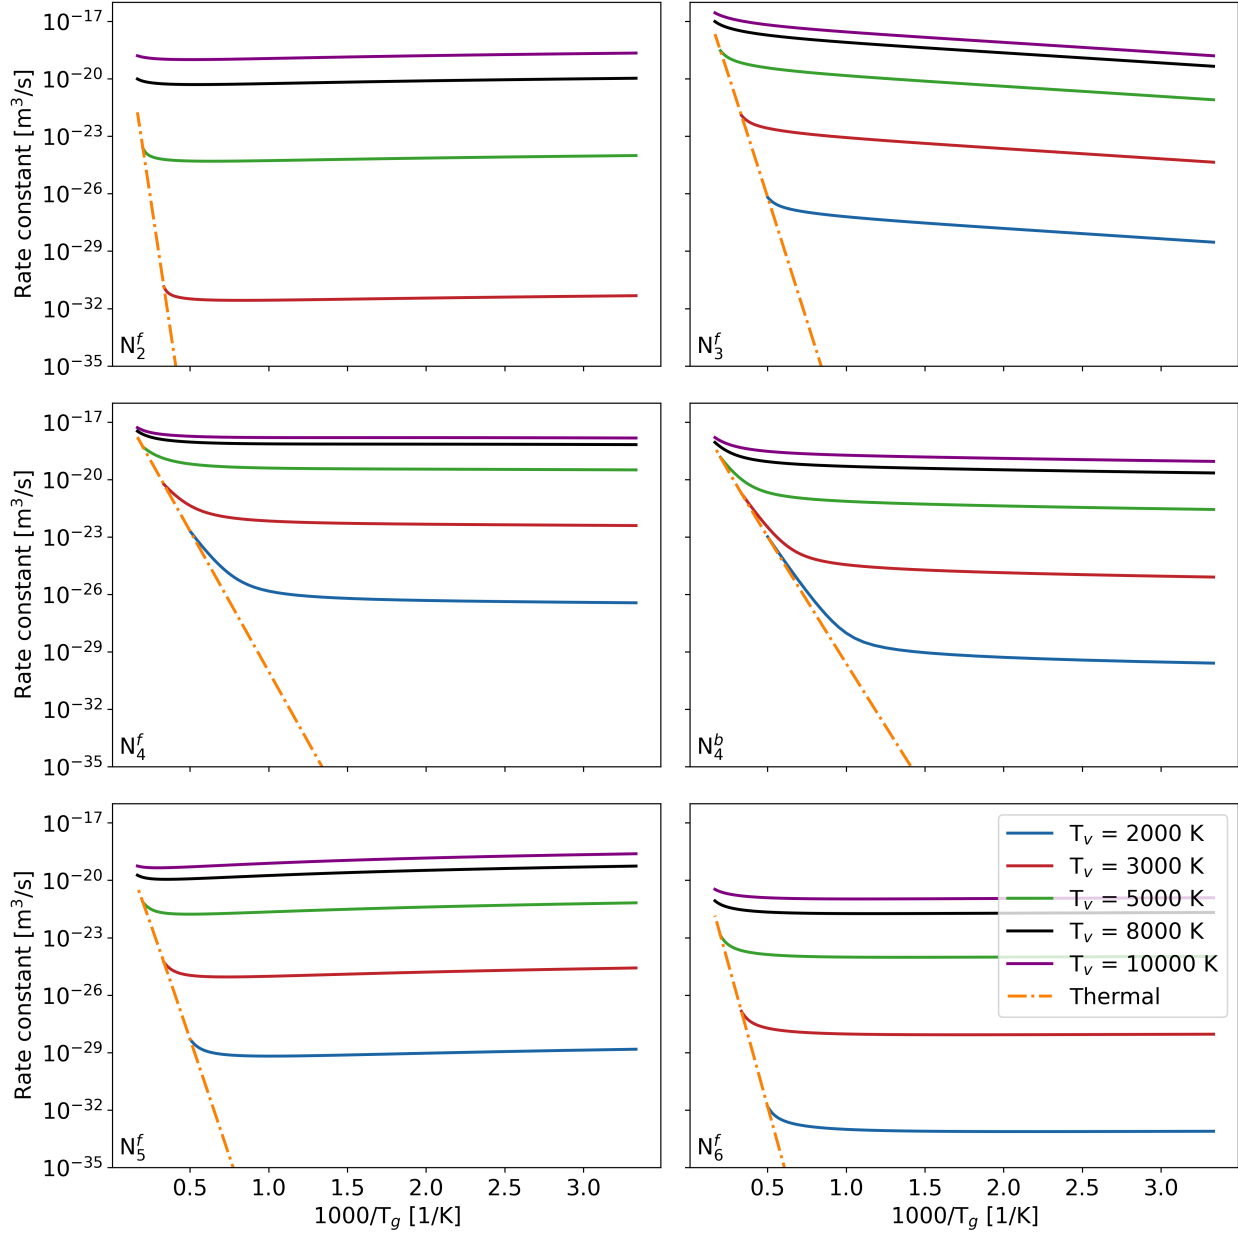

Figure S2: The overall reaction rates of  $N_2^f$ ,  $N_3^f$ ,  $N_4^f$ ,  $N_4^b$ ,  $N_5^f$ ,  $N_6^f$  as a function of the gas and vibrational temperature with different vibrational temperatures. The output for rated constants of the three-body reaction is multiplied by the contraction of third bodies.
